# Supplementary material
Source: Springer Nature journal article supplement (https://www.springermedizin.de/resource/supplementary/12967_2013_1546_MOESM9_ESM.pdf/9574316)

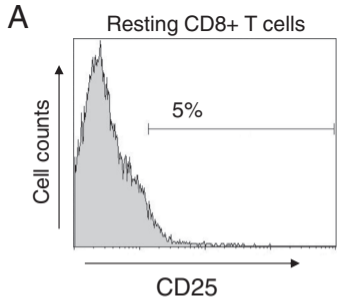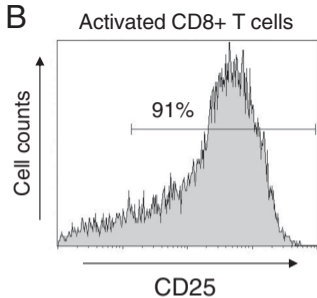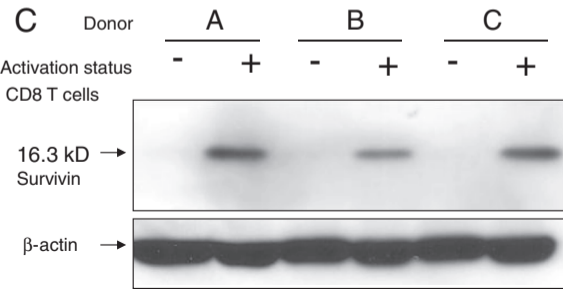

Supplement: MOESM9 [file 9574316]
